# Supplementary material for: An explorative study on proteomic analyses related to inflammation and pain in children with juvenile idiopathic arthritis
Source: Springer Nature journal article supplement (doi:10.1186/s12887-023-04181-0), 2023-07-15
Supplement: MOESM6 [file 25801232]

**Additional Table 6. Olink data Welch two sample T-test healthy controls and high disease activity**

| Name     | missing freq | estimate | control | High disease activity | statistic | p-value  | parameter | conf.low | conf.high | adj p-value | Threshold       |
|----------|--------------|----------|---------|-----------------------|-----------|----------|-----------|----------|-----------|-------------|-----------------|
| HGF      | 0            | -0,46    | 8,59    | 9,04                  | -5,59     | 1,05E-06 | 48,29     | -0,62    | -0,29     | 8,73E-05    | Significant     |
| IL6      | 0            | -1,62    | 3,18    | 4,80                  | -5,25     | 1,90E-06 | 63,55     | -2,24    | -1,01     | 8,73E-05    | Significant     |
| EN-RAGE  | 0            | -1,04    | 2,65    | 3,69                  | -4,90     | 6,99E-06 | 63,13     | -1,47    | -0,62     | 2,01E-04    | Significant     |
| GDNF     | 0            | -0,48    | 2,29    | 2,77                  | -5,10     | 8,74E-06 | 39,89     | -0,66    | -0,29     | 2,01E-04    | Significant     |
| OSM      | 0            | -0,93    | 3,66    | 4,59                  | -4,73     | 2,82E-05 | 39,93     | -1,32    | -0,53     | 5,19E-04    | Significant     |
| MCP-3    | 0            | -0,66    | 2,08    | 2,74                  | -4,36     | 4,74E-05 | 65,50     | -0,96    | -0,36     | 6,46E-04    | Significant     |
| CSF-1    | 0            | -0,29    | 10,08   | 10,37                 | -4,67     | 4,92E-05 | 32,65     | -0,42    | -0,17     | 6,46E-04    | Significant     |
| FGF-19   | 0            | -0,80    | 7,52    | 8,32                  | -3,73     | 6,18E-04 | 38,96     | -1,24    | -0,37     | 6,92E-03    | Significant     |
| VEGFA    | 0            | -0,40    | 10,64   | 11,04                 | -3,63     | 6,77E-04 | 48,93     | -0,62    | -0,18     | 6,92E-03    | Significant     |
| NT-3     | 0            | -0,47    | 3,24    | 3,71                  | -3,30     | 1,81E-03 | 48,41     | -0,76    | -0,18     | 1,67E-02    | Significant     |
| CXCL10   | 0            | -0,75    | 9,04    | 9,79                  | -3,29     | 2,00E-03 | 43,25     | -1,21    | -0,29     | 1,67E-02    | Significant     |
| FGF-21   | 0            | 1,18     | 5,52    | 4,34                  | 3,11      | 3,38E-03 | 41,49     | 0,41     | 1,95      | 2,43E-02    | Significant     |
| PD-L1    | 0            | -0,29    | 6,61    | 6,90                  | -3,18     | 3,48E-03 | 29,31     | -0,48    | -0,10     | 2,43E-02    | Significant     |
| TNFSF14  | 0            | -0,46    | 4,29    | 4,75                  | -3,02     | 3,79E-03 | 58,07     | -0,77    | -0,16     | 2,43E-02    | Significant     |
| DNER     | 0            | 0,19     | 9,85    | 9,66                  | 3,05      | 4,17E-03 | 37,45     | 0,06     | 0,31      | 2,43E-02    | Significant     |
| ARTN     | 0.47778      | -0,26    | 1,00    | 1,26                  | -3,00     | 4,23E-03 | 50,70     | -0,44    | -0,09     | 2,43E-02    | Significant     |
| MMP-1    | 0            | -1,01    | 9,62    | 10,62                 | -2,87     | 6,45E-03 | 41,36     | -1,72    | -0,30     | 3,49E-02    | Significant     |
| TNFRSF9  | 0            | 0,37     | 8,61    | 8,25                  | 2,81      | 7,85E-03 | 37,20     | 0,10     | 0,63      | 4,01E-02    | Significant     |
| CCL23    | 0            | -0,38    | 9,89    | 10,27                 | -2,79     | 8,35E-03 | 36,83     | -0,65    | -0,10     | 4,04E-02    | Significant     |
| FGF-23   | 0            | -0,24    | 3,07    | 3,31                  | -2,65     | 1,09E-02 | 49,12     | -0,42    | -0,06     | 5,03E-02    | Non-significant |
| IL13     | 0.57778      | -0,41    | 1,16    | 1,57                  | -2,29     | 2,52E-02 | 64,18     | -0,77    | -0,05     | 1,10E-01    | Non-significant |
| Beta-NGF | 0.55556      | -0,07    | 1,21    | 1,27                  | -2,29     | 2,72E-02 | 41,16     | -0,12    | -0,01     | 1,14E-01    | Non-significant |
| CCL4     | 0            | -0,35    | 6,00    | 6,35                  | -2,24     | 3,23E-02 | 30,93     | -0,67    | -0,03     | 1,29E-01    | Non-significant |
| CDCP1    | 0            | -0,30    | 3,02    | 3,32                  | -2,18     | 3,65E-02 | 34,77     | -0,58    | -0,02     | 1,40E-01    | Non-significant |
| CCL25    | 0            | 0,34     | 6,57    | 6,23                  | 2,17      | 3,90E-02 | 27,08     | 0,02     | 0,67      | 1,43E-01    | Non-significant |
| CCL28    | 0            | -0,20    | 2,27    | 2,47                  | -2,10     | 4,16E-02 | 46,21     | -0,39    | -0,01     | 1,46E-01    | Non-significant |
| IL-20RA  | 0.15556      | -0,17    | 1,49    | 1,66                  | -2,05     | 4,45E-02 | 60,12     | -0,33    | 0,00      | 1,46E-01    | Non-significant |
| FIt3L    | 0            | -0,23    | 8,96    | 9,19                  | -2,08     | 4,45E-02 | 34,68     | -0,46    | -0,01     | 1,46E-01    | Non-significant |
| CD244    | 0            | -0,18    | 7,64    | 7,82                  | -2,00     | 5,40E-02 | 32,65     | -0,37    | 0,00      | 1,71E-01    | Non-significant |
| CCL3     | 0            | -0,32    | 4,62    | 4,94                  | -1,95     | 5,70E-02 | 49,04     | -0,65    | 0,01      | 1,75E-01    | Non-significant |

|            |         |       |       |       |       |          |       |       |      |          |                 |
|------------|---------|-------|-------|-------|-------|----------|-------|-------|------|----------|-----------------|
| IL-18R1    | 0       | -0,22 | 8,70  | 8,92  | -1,91 | 6,52E-02 | 30,83 | -0,45 | 0,01 | 1,90E-01 | Non-significant |
| TRANCE     | 0       | -0,36 | 5,67  | 6,03  | -1,90 | 6,59E-02 | 33,13 | -0,75 | 0,03 | 1,90E-01 | Non-significant |
| IL33       | 0.72222 | 0,23  | 1,68  | 1,46  | 1,88  | 7,48E-02 | 19,34 | -0,02 | 0,48 | 2,05E-01 | Non-significant |
| IL-17A     | 0.01111 | -0,27 | 2,07  | 2,35  | -1,83 | 7,58E-02 | 33,35 | -0,57 | 0,03 | 2,05E-01 | Non-significant |
| TNFB       | 0       | 0,28  | 6,22  | 5,95  | 1,80  | 8,08E-02 | 32,13 | -0,04 | 0,59 | 2,12E-01 | Non-significant |
| IL7        | 0       | -0,27 | 3,16  | 3,43  | -1,71 | 9,47E-02 | 47,27 | -0,60 | 0,05 | 2,42E-01 | Non-significant |
| ADA        | 0       | 0,13  | 6,16  | 6,03  | 1,57  | 1,23E-01 | 43,11 | -0,04 | 0,30 | 3,05E-01 | Non-significant |
| ST1A1      | 0       | -0,36 | 2,70  | 3,06  | -1,50 | 1,42E-01 | 36,76 | -0,84 | 0,13 | 3,45E-01 | Non-significant |
| IL-24      | 0.07778 | -0,23 | 1,66  | 1,90  | -1,44 | 1,57E-01 | 36,45 | -0,56 | 0,09 | 3,71E-01 | Non-significant |
| MCP-2      | 0       | -0,29 | 8,48  | 8,77  | -1,30 | 2,05E-01 | 25,22 | -0,75 | 0,17 | 4,72E-01 | Non-significant |
| AXIN1      | 0.01111 | -0,51 | 4,11  | 4,62  | -1,25 | 2,20E-01 | 31,19 | -1,33 | 0,32 | 4,93E-01 | Non-significant |
| CD40       | 0       | -0,16 | 11,65 | 11,81 | -1,23 | 2,26E-01 | 38,52 | -0,42 | 0,10 | 4,95E-01 | Non-significant |
| 4E-BP1     | 0       | 0,29  | 8,79  | 8,49  | 1,20  | 2,38E-01 | 30,63 | -0,20 | 0,79 | 5,10E-01 | Non-significant |
| SLAMF1     | 0       | -0,08 | 1,92  | 1,99  | -1,15 | 2,56E-01 | 50,85 | -0,21 | 0,06 | 5,22E-01 | Non-significant |
| NRTN       | 0.54444 | -0,11 | 1,06  | 1,17  | -1,13 | 2,64E-01 | 60,85 | -0,31 | 0,09 | 5,22E-01 | Non-significant |
| IL-1 alpha | 0.34444 | 0,39  | 0,06  | -0,32 | 1,13  | 2,70E-01 | 25,94 | -0,32 | 1,09 | 5,22E-01 | Non-significant |
| SIRT2      | 0       | -0,36 | 4,91  | 5,27  | -1,11 | 2,72E-01 | 39,72 | -1,01 | 0,29 | 5,22E-01 | Non-significant |
| CXCL6      | 0       | 0,25  | 8,71  | 8,46  | 1,12  | 2,73E-01 | 34,20 | -0,21 | 0,71 | 5,22E-01 | Non-significant |
| IL-22 RA1  | 0.16667 | -0,24 | 2,47  | 2,71  | -1,11 | 2,79E-01 | 24,08 | -0,67 | 0,20 | 5,24E-01 | Non-significant |
| MCP-1      | 0       | 0,15  | 11,54 | 11,39 | 1,06  | 2,96E-01 | 31,55 | -0,14 | 0,45 | 5,45E-01 | Non-significant |
| STAMBP     | 0       | -0,25 | 5,92  | 6,17  | -1,01 | 3,18E-01 | 41,74 | -0,75 | 0,25 | 5,51E-01 | Non-significant |
| TSLP       | 0.36667 | -0,14 | 0,77  | 0,91  | -1,00 | 3,19E-01 | 66,96 | -0,41 | 0,14 | 5,51E-01 | Non-significant |
| uPA        | 0       | 0,08  | 10,79 | 10,70 | 1,01  | 3,20E-01 | 38,76 | -0,08 | 0,25 | 5,51E-01 | Non-significant |
| CXCL1      | 0       | 0,27  | 8,62  | 8,35  | 1,00  | 3,24E-01 | 35,61 | -0,28 | 0,82 | 5,51E-01 | Non-significant |
| IL-15RA    | 0       | 0,10  | 2,08  | 1,98  | 0,98  | 3,38E-01 | 21,05 | -0,11 | 0,31 | 5,57E-01 | Non-significant |
| IL-2RB     | 0.24444 | -0,10 | 1,75  | 1,85  | -0,95 | 3,44E-01 | 66,24 | -0,31 | 0,11 | 5,57E-01 | Non-significant |
| FN-gamma   | 0       | -0,30 | 6,65  | 6,95  | -0,96 | 3,45E-01 | 39,21 | -0,94 | 0,34 | 5,57E-01 | Non-significant |
| CCL11      | 0       | 0,14  | 6,66  | 6,52  | 0,93  | 3,60E-01 | 27,29 | -0,17 | 0,44 | 5,71E-01 | Non-significant |
| IL8        | 0       | 0,19  | 5,06  | 4,87  | 0,91  | 3,70E-01 | 29,39 | -0,23 | 0,60 | 5,76E-01 | Non-significant |
| IL-10RB    | 0       | -0,07 | 6,12  | 6,19  | -0,88 | 3,86E-01 | 29,97 | -0,24 | 0,09 | 5,76E-01 | Non-significant |
| TRAIL      | 0       | -0,06 | 8,49  | 8,56  | -0,87 | 3,88E-01 | 36,91 | -0,20 | 0,08 | 5,76E-01 | Non-significant |
| IL4        | 0.12222 | -0,14 | 1,81  | 1,94  | -0,87 | 3,88E-01 | 30,58 | -0,45 | 0,18 | 5,76E-01 | Non-significant |
| IL2        | 0.97778 | -0,04 | 1,06  | 1,09  | -0,79 | 4,36E-01 | 39,05 | -0,13 | 0,06 | 6,37E-01 | Non-significant |

|            |          |       |       |       |       |          |       |       |      |          |                 |
|------------|----------|-------|-------|-------|-------|----------|-------|-------|------|----------|-----------------|
| TNF        | 0        | -0,12 | 4,33  | 4,45  | -0,75 | 4,57E-01 | 29,35 | -0,46 | 0,21 | 6,54E-01 | Non-significant |
| FGF-5      | 0.011111 | -0,07 | 1,48  | 1,55  | -0,74 | 4,62E-01 | 31,38 | -0,26 | 0,12 | 6,54E-01 | Non-significant |
| CXCL11     | 0        | -0,26 | 8,23  | 8,50  | -0,73 | 4,69E-01 | 26,56 | -1,00 | 0,47 | 6,54E-01 | Non-significant |
| P TGF-beta | 0        | -0,10 | 7,88  | 7,97  | -0,67 | 5,05E-01 | 34,02 | -0,38 | 0,19 | 6,93E-01 | Non-significant |
| CASP-8     | 0        | 0,08  | 2,23  | 2,14  | 0,66  | 5,15E-01 | 31,20 | -0,18 | 0,35 | 6,97E-01 | Non-significant |
| CXCL9      | 0        | -0,20 | 7,46  | 7,66  | -0,64 | 5,26E-01 | 27,88 | -0,83 | 0,44 | 7,01E-01 | Non-significant |
| OPG        | 0        | -0,05 | 10,15 | 10,20 | -0,59 | 5,61E-01 | 33,70 | -0,22 | 0,12 | 7,17E-01 | Non-significant |
| MCP-4      | 0        | -0,15 | 12,79 | 12,94 | -0,58 | 5,69E-01 | 26,21 | -0,69 | 0,39 | 7,17E-01 | Non-significant |
| IL-20      | 0.333333 | 0,07  | 1,06  | 0,99  | 0,57  | 5,73E-01 | 18,27 | -0,20 | 0,35 | 7,17E-01 | Non-significant |
| CST5       | 0        | -0,07 | 5,66  | 5,72  | -0,56 | 5,77E-01 | 48,15 | -0,31 | 0,18 | 7,17E-01 | Non-significant |
| SCF        | 0        | 0,06  | 9,59  | 9,53  | 0,56  | 5,81E-01 | 36,64 | -0,15 | 0,27 | 7,17E-01 | Non-significant |
| IL-12B     | 0        | -0,08 | 6,95  | 7,03  | -0,55 | 5,89E-01 | 28,09 | -0,39 | 0,23 | 7,17E-01 | Non-significant |
| CCL20      | 0        | 0,10  | 7,89  | 7,79  | 0,53  | 5,97E-01 | 38,81 | -0,28 | 0,47 | 7,17E-01 | Non-significant |
| TWEAK      | 0        | -0,04 | 10,08 | 10,12 | -0,53 | 6,01E-01 | 48,00 | -0,20 | 0,11 | 7,17E-01 | Non-significant |
| CCL19      | 0        | -0,10 | 10,06 | 10,16 | -0,45 | 6,53E-01 | 28,66 | -0,57 | 0,36 | 7,61E-01 | Non-significant |
| CD6        | 0        | -0,07 | 6,40  | 6,47  | -0,45 | 6,53E-01 | 30,47 | -0,39 | 0,25 | 7,61E-01 | Non-significant |
| LIF        | 0.311111 | -0,07 | 0,99  | 1,06  | -0,40 | 6,92E-01 | 39,27 | -0,42 | 0,28 | 7,88E-01 | Non-significant |
| CXCL5      | 0        | -0,15 | 10,18 | 10,33 | -0,40 | 6,94E-01 | 34,27 | -0,94 | 0,63 | 7,88E-01 | Non-significant |
| IL-17C     | 0.133333 | -0,05 | 1,80  | 1,85  | -0,36 | 7,21E-01 | 24,64 | -0,32 | 0,23 | 8,00E-01 | Non-significant |
| MMP-10     | 0        | -0,08 | 8,91  | 8,99  | -0,35 | 7,28E-01 | 25,12 | -0,53 | 0,37 | 8,00E-01 | Non-significant |
| LIF-R      | 0        | 0,02  | 4,36  | 4,35  | 0,35  | 7,31E-01 | 38,49 | -0,09 | 0,13 | 8,00E-01 | Non-significant |
| CD5        | 0        | -0,04 | 6,01  | 6,05  | -0,33 | 7,44E-01 | 28,34 | -0,31 | 0,23 | 8,05E-01 | Non-significant |
| IL10       | 0        | -0,07 | 4,76  | 4,83  | -0,30 | 7,64E-01 | 25,90 | -0,58 | 0,43 | 8,18E-01 | Non-significant |
| IL-10RA    | 0.022222 | -0,05 | 1,72  | 1,76  | -0,26 | 7,94E-01 | 25,80 | -0,40 | 0,31 | 8,37E-01 | Non-significant |
| TGF-alpha  | 0        | 0,02  | 3,89  | 3,87  | 0,25  | 8,00E-01 | 49,78 | -0,14 | 0,18 | 8,37E-01 | Non-significant |
| IL18       | 0        | 0,02  | 8,89  | 8,87  | 0,15  | 8,84E-01 | 29,04 | -0,28 | 0,32 | 9,13E-01 | Non-significant |
| IL5        | 0.177778 | 0,04  | 1,99  | 1,94  | 0,11  | 9,14E-01 | 20,15 | -0,79 | 0,88 | 9,26E-01 | Non-significant |
| CD8A       | 0        | 0,02  | 11,51 | 11,49 | 0,11  | 9,16E-01 | 40,39 | -0,32 | 0,36 | 9,26E-01 | Non-significant |
| CX3CL1     | 0        | 0,00  | 6,11  | 6,11  | -0,04 | 9,68E-01 | 30,73 | -0,20 | 0,20 | 9,68E-01 | Non-significant |
